# Supplementary material for: Harnessing Context Sensing to Develop a Mobile Intervention for Depression
Source: J Med Internet Res. 2011 Aug 12;13(3):e55. doi: 10.2196/jmir.1838 (PMC3222181; doi:10.2196/jmir.1838)
Supplement: Supplementary file 1 [file jmir_v13i3e55_app1.pdf]

## Multimedia Appendix 1

Acceleration: X Axis  
Acceleration: Y Axis  
Acceleration: Z Axis  
Altitude  
Ambient Light  
Application Status (multiple)  
Battery Level  
Bluetooth (multiple)  
Cellular Tower  
Country  
Current Application (multiple)  
Current Area Code  
Current Mobile Country  
Current Mobile Network  
Current Profile  
Day and Night Sensor  
Day of Month  
Day of Week  
Device Orientation  
Device Proximity  
Language  
Last Call Duration  
Last Caller  
Last Initiated Call Duration  
Last Received Call Duration  
Latitude  
Lock Status  
Longitude  
Missed Call Count  
Power State  
Ring Volume  
Rotation: X Axis  
Rotation: Y Axis  
Rotation: Z Axis  
Time of Day  
Time Since Last Call  
Unread E-Mail Count  
Unread SMS Count
